# Supplementary material for: Quality of Life in Ugandan Children and Young Adults After Surgery for Congenital Heart Disease: Mixed Methods Approach
Source: PubMed Central journal article supplement (PMC11025577; doi:10.5334/gh.1320), 2024-04-17
Supplement: gh-19-1-1320-s1.pdf [file gh-19-1-1320-s1.pdf]

Supplemental Table: HRQOL Scores by Location of Surgery

| <b>Peds QL 4.0 (Pediatric Patients)</b> | <b>Uganda</b> | <b>Abroad</b> | <b><i>p-value</i></b> |
|-----------------------------------------|---------------|---------------|-----------------------|
| Physical score                          | 89.66 ± 11.82 | 88.14 ± 17.39 | 0.4892                |
| Emotional score                         | 87.12 ± 11.50 | 90.93 ± 15.60 | 0.184                 |
| Social score                            | 90.77 ± 16.41 | 90.00 ± 17.30 | 0.0985                |
| School score                            | 89.80 ± 11.94 | 79.27 ± 18.81 | <b>0.0117</b>         |
| <b>SF-36 (Young Adults Patients)</b>    |               |               |                       |
| Physical score                          | 92.00 ± 9.07  | 85.45 ± 11.65 | 0.078                 |
| Emotional score                         | 78.22 ± 14.85 | 68.20 ± 16.34 | 0.0592                |
| Social score                            | 94.44 ± 11.02 | 75.05 ± 21.84 | <b>0.0119</b>         |
| General score                           | 86.67 ± 11.99 | 70.75 ± 20.98 | <b>0.0311</b>         |
| Pain                                    | 88.67 ± 17.35 | 66.55 ± 26.61 | <b>0.0168</b>         |
| Energy Fatigue                          | 71.67 ± 18.71 | 66.75 ± 14.35 | 0.319                 |
| Physical (Role limitation)              | 97.22 ± 8.33  | 75.00 ± 35.36 | 0.0558                |
| Emotional (Role limitation)             | 100.00 ± 0.00 | 84.95 ± 31.57 | 0.0896                |
